# Supplementary material for: Effect of salt seed particle surface area, composition and phase on secondary organic aerosol mass yields in oxidation flow reactors
Source: Copernicus journal article supplement (doi:10.5194/acp-2018-1053), 2018-10-19
Supplement: Supplementary file 1 [file acp-2018-1053-supplement.pdf]

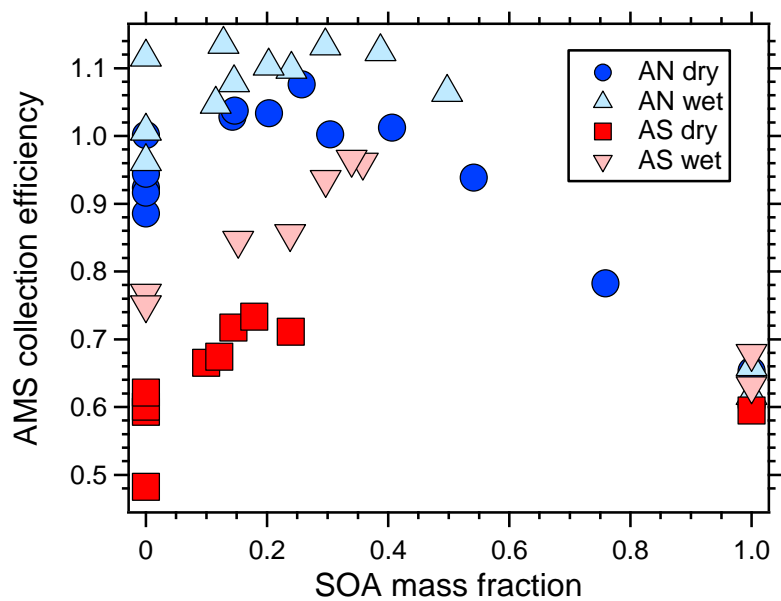

Figure S1. Collection efficiency (CE) of the AMS as a function of SOA mass fraction, calculated using the mixture density and SMPS volume concentration. The collection efficiency of ammonium sulphate increases up to a mass fraction of ~0.4. Above 0.4 the CE of ammonium nitrate seems to decrease. This is most likely due to the formation of pure SOA particles. Nucleated SOA particles are smaller and have a lower CE.

5
